# Supplementary material
Source: publisher figshare collection journal article supplement (https://acs.figshare.com/ndownloader/files/4460965)
Supplement: Supplementary file 1 [file 4460965]

# Functionalization of Fibers Using Azlactone-Containing Polymers: Layer-by-Layer Fabrication of Reactive Thin Films on the Surfaces of Hair and Cellulose-Based Materials

Maren E. Buck<sup>1</sup> and David M. Lynn<sup>1,2\*</sup>

<sup>1</sup>Department of Chemistry, 1101 University Avenue, and <sup>2</sup>Department of Chemical and Biological Engineering, 1415 Engineering Drive, University of Wisconsin-Madison, Madison, WI 53706

## Supporting Information

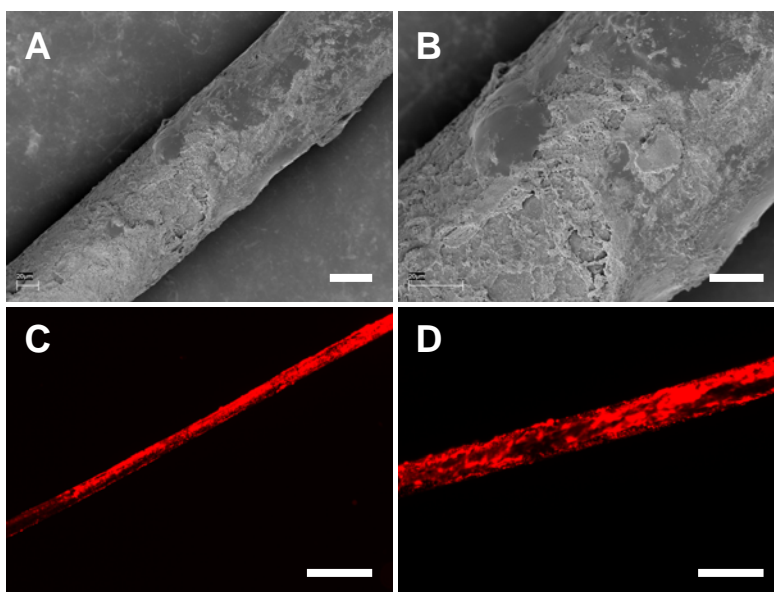

**Figure S1.** (A-B) SEM images of horsehair coated with 10 PEI/PVDMA bilayers fabricated in DMSO. (C-D) Fluorescence microscopy images of horsehair coated with 10 PEI/PVDMA<sub>TMR</sub> bilayers deposited from DMSO. Scale bars: A) 40  $\mu\text{m}$ , B) 20  $\mu\text{m}$ , C) 500  $\mu\text{m}$ , and D) 20  $\mu\text{m}$ .

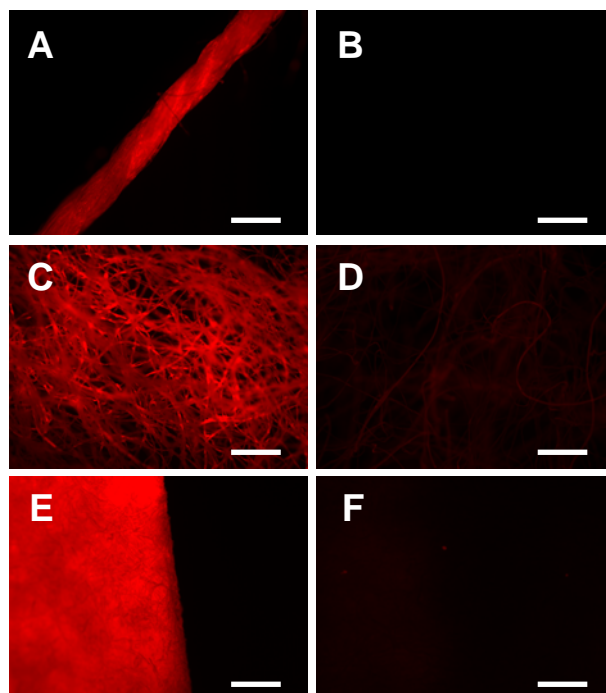

**Figure S2.** A-B) Fluorescence microscopy images of a piece of cotton thread coated with 10 PEI/PVDMA bilayers (A) and an uncoated piece of thread (B), both treated with TMR-cadaverine. C-D) Fluorescence microscopy images of a cotton ball coated with 10 PEI/PVDMA bilayers (C) and an uncoated cotton ball (D), both treated with TMR-cadaverine. E-F) Fluorescence microscopy images of a piece of filter paper coated with 10 PEI/PVDMA bilayers (E) and a piece of uncoated filter paper (F), both treated with TMR-cadaverine. Scale bars = 500  $\mu\text{m}$ .
